# Supplementary material
Source: PubMed Central journal article supplement (PMC5698909)
Supplement: NIHMS919178-supplement-Supplemental.pdf [file NIHMS919178-supplement-Supplemental.pdf]

**Current Biology, Volume 27**

**Supplemental Information**

**A Peptidergic Circuit Links the Circadian**

**Clock to Locomotor Activity**

**Anna N. King, Annika F. Barber, Amelia E. Smith, Austin P. Dreyer, Divya Sitaraman, Michael N. Nitabach, Daniel J. Cavanaugh, and Amita Sehgal**

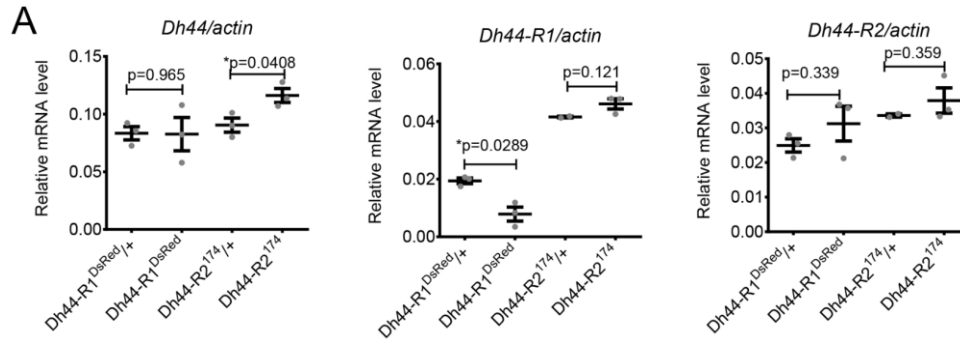

**B**

|             |             |            |            |             |            |            |
|-------------|-------------|------------|------------|-------------|------------|------------|
| Dh44-R2 WT  | MADDDLRLALV | DSLDDASQED | LAKVIANFSV | DMLQRASALI  | GAQQGSSGGQ | LQNRTLQCQQ |
| Dh44-R2 174 | MADDDLRLALV | DSLDDASQED | LAKVIANFSV | DMLQRASALI  | GAQQGSSGGQ | LQNRTLQCQQ |
|             |             |            |            |             |            |            |
| Dh44-R2 WT  | QQQREEEQAS  | LEALASGGKR | ILQCPSSFDS | VLCWPRTNAG  | SLAVLPCFEE | FKGVHYDSTD |
| Dh44-R2 174 | QQQREEEQAS  | LEALASGGKR | ILQCPSSFDS | VLCWPRTNAG  | SLAVLPCFEE | FKGVHYDSTD |
|             |             |            |            |             |            |            |
| Dh44-R2 WT  | NATRFVCFPNG | TWDHYSYDR  | CHQNSGSIPV | VPDFSPNVEL  | PAIYAGGYF  | LSFATLVVAL |
| Dh44-R2 174 | NATRFVCFPNG | TWDHYSYDR  | CHQNSGSIPV | VPDFSPNVEL  | PAIYAGGYF  | LSFATLVVAL |
|             |             |            |            |             |            |            |
| Dh44-R2 WT  | IIFLSFKDLR  | CLRNTIHANL | FLTYITSALL | WILTLFLQVI  | TESSQAGCI  | TLVIMFYFY  |
| Dh44-R2 174 | IIFLSFKDLR  | CLRNTIHANL | FLTYITSALL | WILTLFLQVI  | TESGWLHNV  | GNHVSVLLPN |
|             |             |            |            |             |            |            |
| Dh44-R2 WT  | LTNFFWMFVE  | GLYLYTLVQ  | TFSSDNISFI | IYALIGWGCP  | AVCILVWSIA | KAFAPHLNE  |
| Dh44-R2 174 | QLFLDVCVGGP | LSVHAGGANI | LQ*H*      |             |            |            |
|             |             |            |            |             |            |            |
| Dh44-R2 WT  | HFNGLEIDCA  | WMRESHIDWI | FKVPASLALL | VNLVFLIRIM  | WVLITKLRSA | HTLETRQYYK |
|             |             |            |            |             |            |            |
| Dh44-R2 WT  | ASKALLVLIP  | LFGITYLLVL | TGPEQGISRN | LFEAIRAFLLI | STQGFFVALF | YCFLNSEVRQ |
|             |             |            |            |             |            |            |
| Dh44-R2 WT  | TLRHGFTRWR  | ESRNIHRNSS | IKNRSTEECV | ICLRPSPHTR  | LGSLQRYHSI | DITDFV*    |

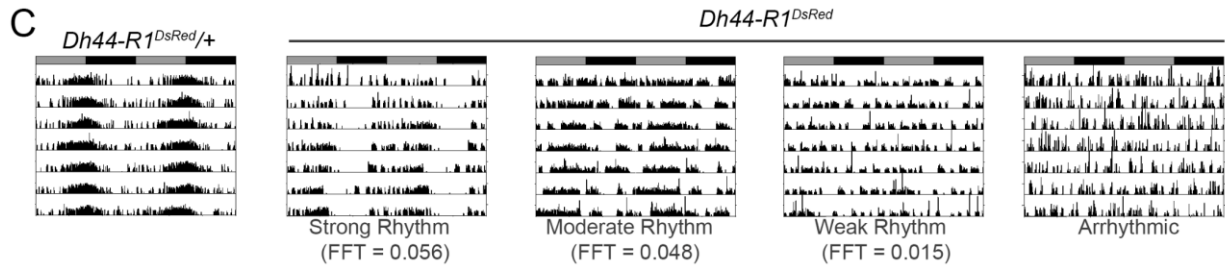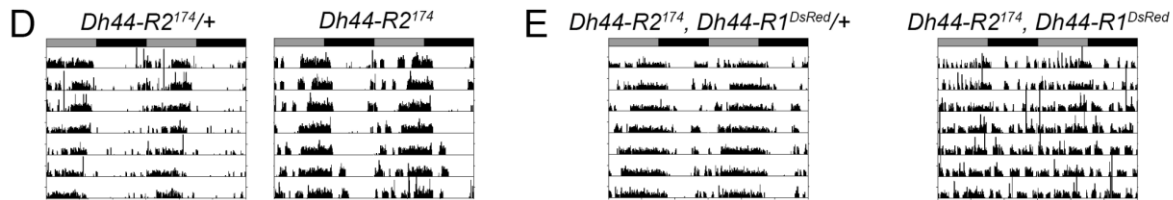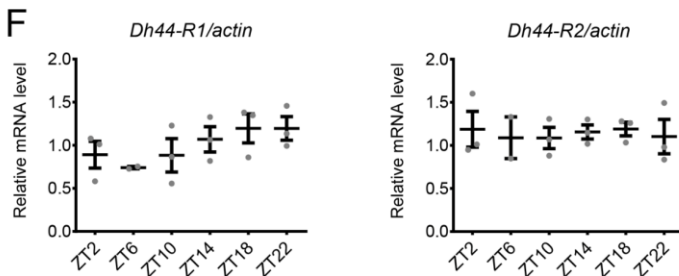

**Figure S1. Characterization of Dh44-R1 and Dh44-R2 mutants. Related to Figure 1.**

(A) mRNA levels for *Dh44-R1*, *Dh44-R2*, and *Dh44* in whole fly tissue from *Dh44-R1<sup>DsRed</sup>* and *Dh44-R2<sup>174</sup>* mutants. mRNA levels were normalized to *actin* and compared to their heterozygous controls. \*P < 0.05 by two-tailed Welch's t-test. qPCR data expressed as mean±SEM from n = 3.

(B) Predicted protein sequences for *Dh44-R2* wild type and *Dh44-R2<sup>174</sup>* mutant alleles. *Dh44-R2<sup>174</sup>* is a frameshift mutation that changes the protein sequence (indicated with bold text) and results in premature stop codons (indicated with \*). Hormone binding domain (blue) and 7-transmembrane domain (orange) are annotated from NCBI's Conserved Domain Database [S1].

(C-E) Representative locomotor activity records from individual flies in constant darkness (DD). Records are double-plotted with gray and black bars indicating subjective day and night, respectively.

(C) Locomotor activity of *Dh44-R1<sup>DsRed/+</sup>* and *Dh44-R1<sup>DsRed</sup>* mutant flies in DD. Representative activity records show examples of *Dh44-R1<sup>DsRed</sup>* homozygous mutants with strong, moderate, weak rhythms or arrhythmic behavior.

(D) Locomotor activity of *Dh44-R2<sup>174/+</sup>* and *Dh44-R2<sup>174</sup>* mutant flies in DD.

(E) Locomotor activity of *Dh44-R2<sup>174</sup>, Dh44-R1<sup>DsRed/+</sup>* and *Dh44-R2<sup>174</sup>, Dh44-R1<sup>DsRed</sup>* double mutant flies in DD.

(F) *Dh44-R1* or *Dh44-R2* mRNA levels in fly head tissue at time points across the day. One-way ANOVA detects no difference between time points (*Dh44-R1*:  $F_{5, 11} = 1.27$ , P = 0.343; and *Dh44-R2*:  $F_{5, 11} = 0.09308$ , P = 0.992).

JTK\_Cycle [S2] does not detect cycling (*Dh44-R1*: P = 0.272; and *Dh44-R2*: P = 1). mRNA levels were normalized to *actin* levels. qPCR data expressed as mean±SEM from n = 2–3 biological replicates.

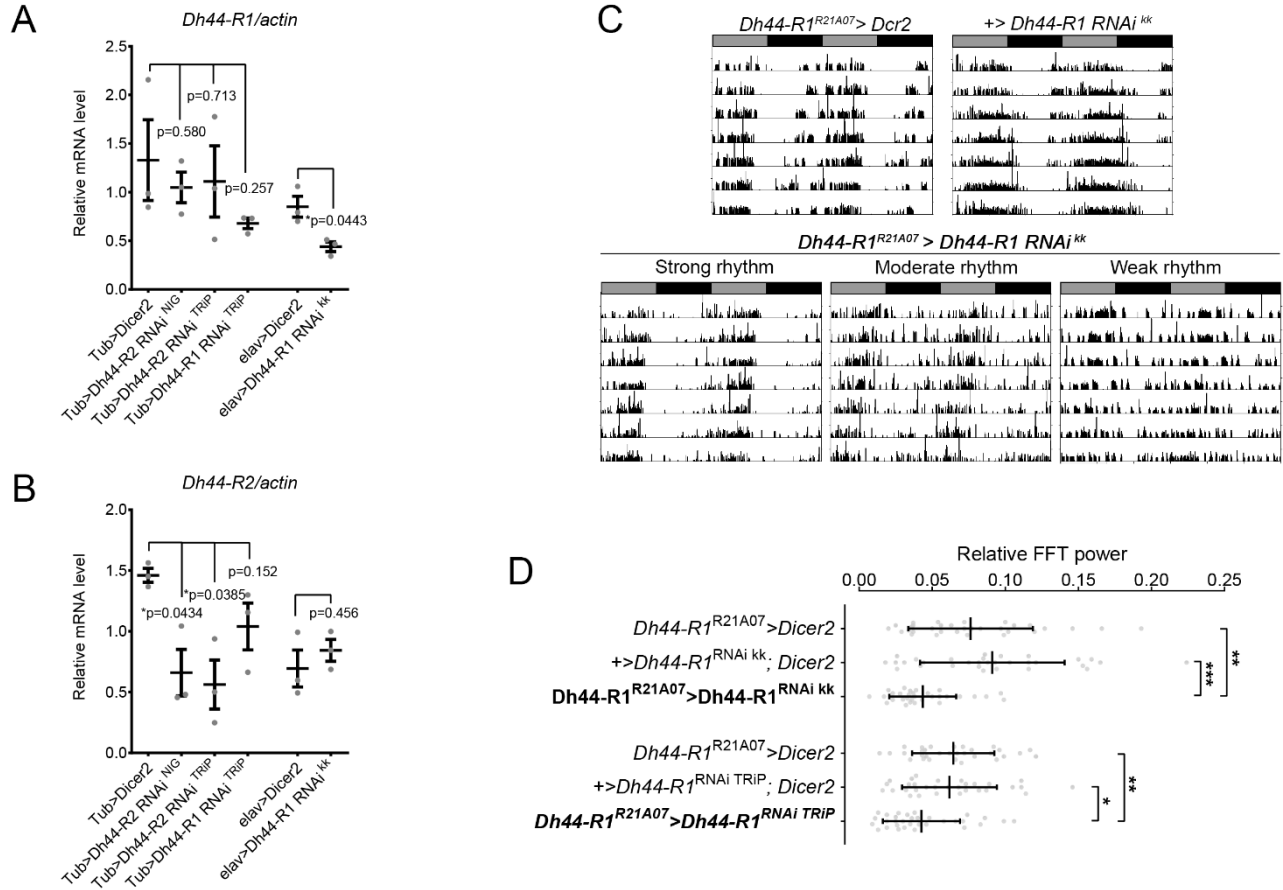

**Figure S2. Analysis of RNAi-mediated knockdown of *Dh44-R1*. Related to Figure 1.**

(A-B) *Dh44-R1* (A) and *Dh44-R2* (B) mRNA levels in whole fly tissue after knockdown of *Dh44-R1* or *Dh44-R2* using *tubulin-GAL4* (*Tub*) or *elav-GAL4*. mRNA levels were normalized to *actin* and compared relative to GAL4>*Dicer2* control. *Dh44-R1<sup>RNAi</sup> <sup>kk</sup>* knockdown with *Tub-GAL4* was lethal. \* $P < 0.05$  by two-tailed Welch's t-test. qPCR data expressed as mean  $\pm$  SEM from  $n = 3$ .

(C) Representative activity records show strong knockdown flies (*Dh44-R1<sup>R21A07</sup>>Dh44-R1 RNAi<sup>kk</sup>*) can have strong, moderate, or weak rhythms. Control flies (*Dh44-R1<sup>R21A07</sup>>Dcr2* or *+>UAS-Dh44-R1 RNAi<sup>kk</sup>*) have strong rest:activity rhythms.

(D) DD amplitude of rest:activity rhythms represented by FFT analysis in the circadian range. RNAi-mediated knockdown of *Dh44-R1* in *Dh44-R1*-expressing cells lowered the amplitude of rest:activity rhythms in flies (\* $P < 0.05$ , \*\* $P < 0.01$ , \*\*\* $P < 0.001$  by One-way ANOVA with Sidak's multiple comparison test).

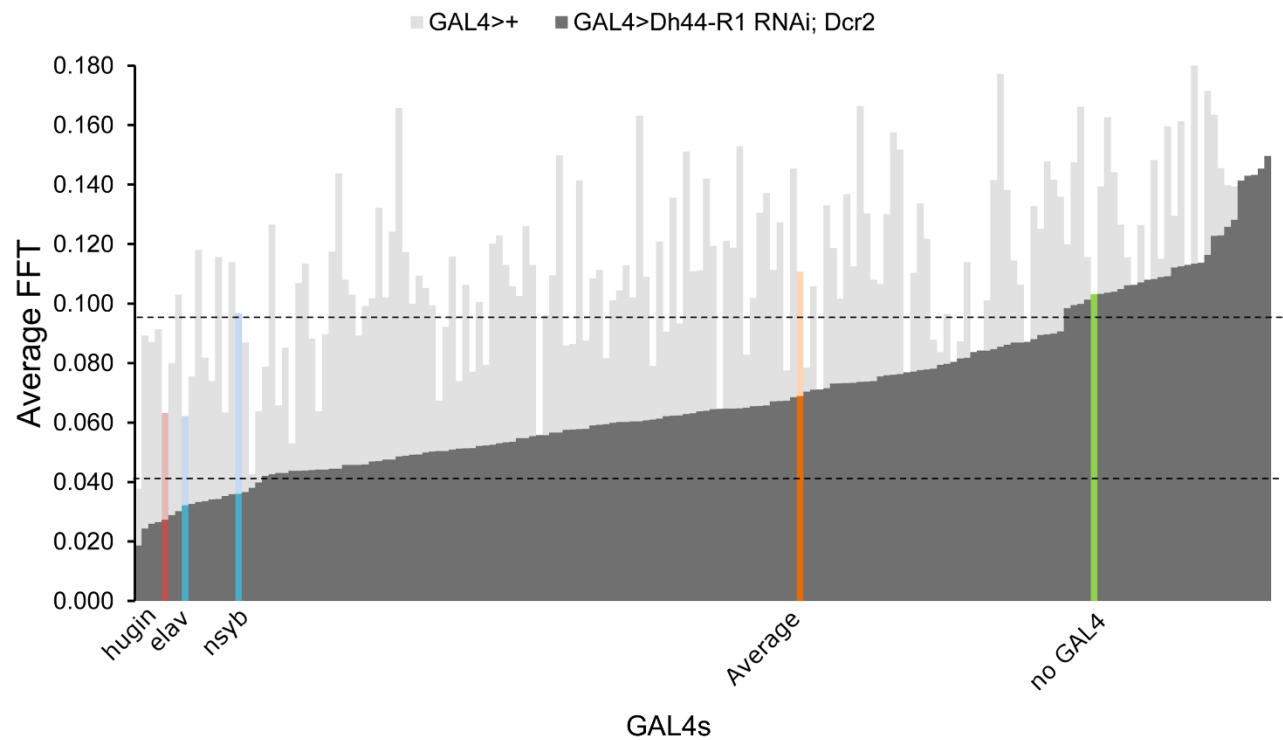

**Figure S3. A GAL4 screen with RNAi identifies cells requiring DH44-R1 for strong rest:activity rhythms.**

**Related to Figure 2.**

The mean FFT values for activity rhythms from flies carrying different GAL4 drivers along with *UAS-Dicer2*; *UAS-Dh44-R1<sup>RNAi<sup>kk</sup></sup>* to knock down DH44-R1 (knockdown, dark gray) or the GAL4 alone (negative control, light gray). The average FFT values from all 168 GAL4 tested (orange), no GAL4 control (*UAS-Dicer2*; *UAS-Dh44-R1<sup>RNAi<sup>kk</sup></sup>*; green), and pan-neuronal GAL4s (blue) are shown. Dashed lines denote 1 standard deviation below and above the average FFT from all 168 GAL4 tested. n = 8-16 flies/GAL4, except n = 190 flies for no GAL4 control.

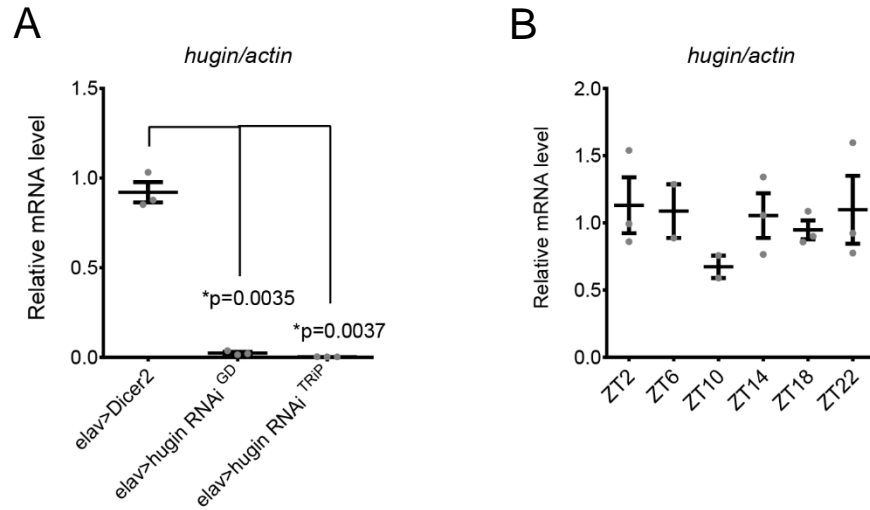

**Figure S4. mRNA levels of *hugin* do not cycle across the day. Related to Figures 4 and 5.**

(A) *hugin* mRNA levels in whole fly tissue after knockdown of *hugin* using *elav*-GAL4 coupled with *Dicer2* to drive RNAi expression. mRNA levels were normalized to *actin* and compared relative to *elav*-GAL4>*Dicer2* control.

\*P<0.01, two-tailed Welch's t-test.

(B) Expression profiling of *hugin* mRNA levels across the day in fly head tissue. One-way ANOVA detects no difference between time points ( $F_{5, 10} = 0.6927$ ,  $P = 0.641$ ). JTK\_Cycle does not detect significant cycling ( $P = 1$ ). mRNA levels normalized to *actin*. All qPCR data expressed as mean±SEM from n = 2-3 biological replicates.

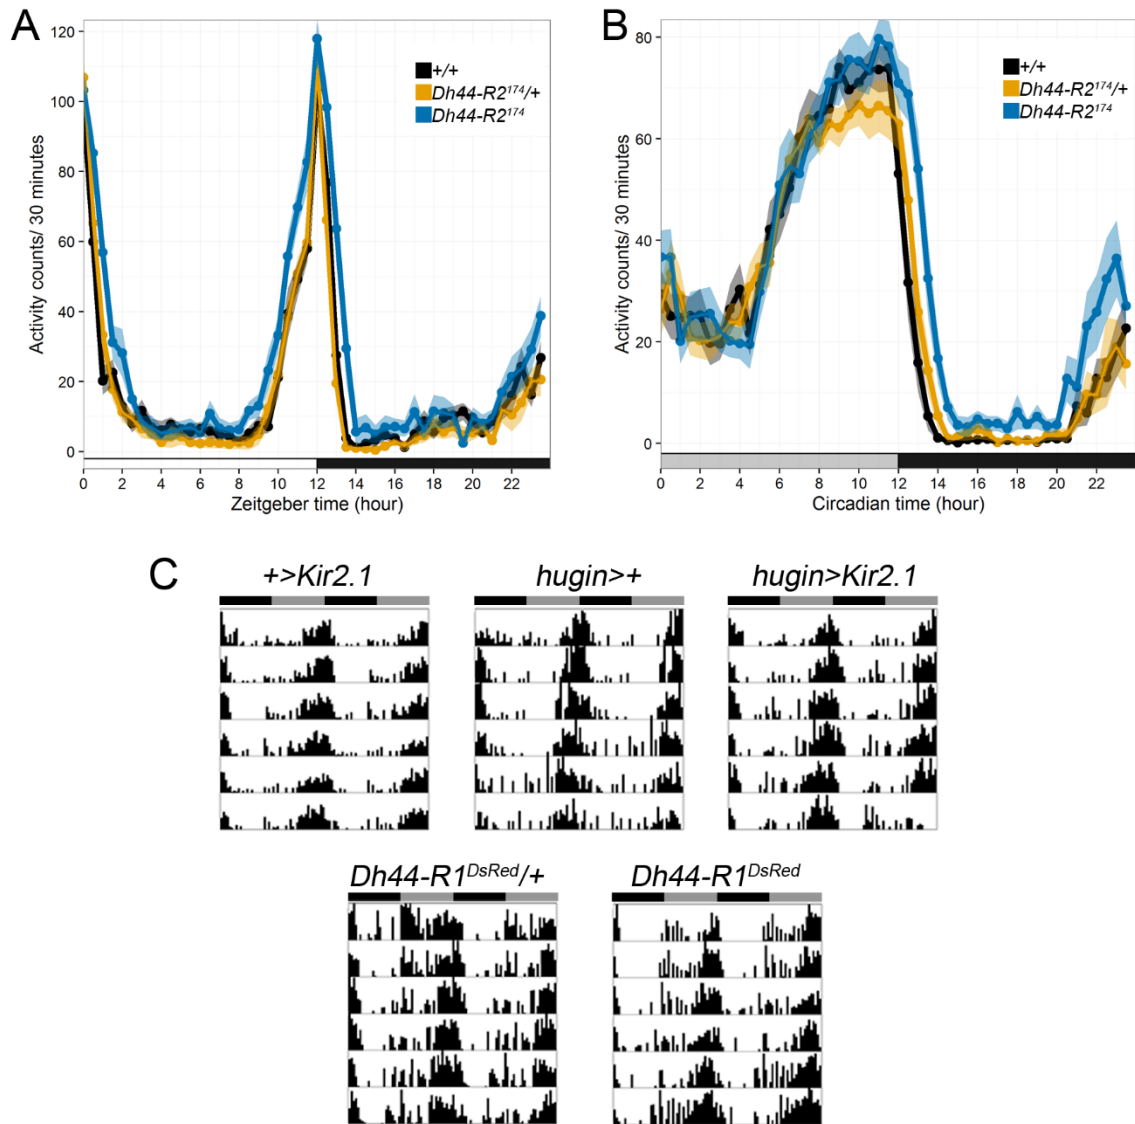

**Figure S5. Analysis of locomotor activity and feeding rhythms. Related to Figure 6.**

(A-B) Locomotor activity profile of *Dh44-R2<sup>174</sup>* mutants averaged over 3 d in LD (A) or 3 d in DD (B). n=15 flies/genotype. Mean  $\pm$  SEM

(C) Representative plots of feeding activity for *+>Kir2.1*, *hugin>+*, and *hugin>Kir2.1* flies (top) and *Dh44-R1<sup>DsRed/+</sup>* and *Dh44-R1<sup>DsRed</sup>* flies (bottom) in DD. Behavior is double plotted with 6 days of data. Gray and black bars represent subjective day and night, respectively.

**Table S1. Analysis of locomotor activity rhythms in flies under DD conditions. Related to Figures 1, 2, and 4.**

Table shows number of flies analyzed (*n*), percentages of rhythmic flies (% R), and length of circadian period in hours as mean±SEM. Bold text indicates experimental genotype.

| <b>Genotype</b>                                                                             | <b>n</b>  | <b>% R</b>  | <b>Period (h) ± SEM</b> |
|---------------------------------------------------------------------------------------------|-----------|-------------|-------------------------|
| <i>Dh44-R1<sup>DsRed/+</sup></i>                                                            | 44        | 97.7        | 23.63 ± 0.04            |
| <i>Dh44-R1<sup>DsRed</sup></i>                                                              | 47        | 80.9        | 23.51 ± 0.12            |
| <i>Dh44-R2<sup>174/+</sup></i>                                                              | 47        | 100         | 23.75 ± 0.03            |
| <i>Dh44-R2<sup>174</sup></i>                                                                | 48        | 95.8        | 23.91 ± 0.03            |
| <i>Dh44-R2<sup>174</sup>, Dh44-R1<sup>DsRed/+</sup></i>                                     | 48        | 100         | 23.61 ± 0.03            |
| <i>Dh44-R2<sup>174</sup>, Dh44-R1<sup>DsRed</sup></i>                                       | 46        | 93.5        | 23.39 ± 0.28            |
| <i>Df(2R)BSC700/+</i>                                                                       | 48        | 100         | 23.63 ± 0.03            |
| <i>Dh44-R1<sup>DsRed</sup>/Df(2R)BSC700</i>                                                 | 47        | 100         | 23.53 ± 0.05            |
| <i>Df(2R)BSC305/+</i>                                                                       | 44        | 100         | 23.78 ± 0.02            |
| <i>Dh44-R2<sup>174</sup>/Df(2R)BSC305</i>                                                   | 45        | 97.8        | 23.56 ± 0.09            |
| <i>pdf<sup>01</sup></i>                                                                     | 46        | 54.3        | 22.96 ± 1.05            |
| <i>pdf<sup>han5304</sup>/Y</i>                                                              | 47        | 68.1        | 22.96 ± 0.62            |
| <i>per<sup>01</sup>/Y</i>                                                                   | 46        | 0           | N/A                     |
| wild type ( <i>w<sup>1118</sup>/Y</i> )                                                     | 46        | 100         | 23.73 ± 0.04            |
|                                                                                             |           |             |                         |
| <i>elav&gt;UAS-Dicer2</i>                                                                   | 47        | 97.9        | 23.41 ± 0.26            |
| <i>+&gt;UAS-Dh44-R1<sup>RNAi kk</sup></i>                                                   | 39        | 100         | 23.67 ± 0.07            |
| <b><i>elav&gt;UAS-Dicer2, UAS-Dh44-R1<sup>RNAi kk</sup></i></b>                             | <b>30</b> | <b>80</b>   | <b>23.46 ± 0.12</b>     |
| <i>+&gt;UAS-Dh44-R1<sup>RNAi TRiP/+</sup></i>                                               | 45        | 97.8        | 23.45 ± 0.08            |
| <b><i>elav&gt;UAS-Dicer2, UAS-Dh44-R1<sup>RNAi TRiP</sup></i></b>                           | <b>45</b> | <b>88.9</b> | <b>23.44 ± 0.13</b>     |
| <i>+&gt;UAS-Dh44-R2<sup>RNAi TRiP</sup></i>                                                 | 46        | 95.7        | 23.51 ± 0.07            |
| <b><i>elav&gt;UAS-Dicer2, UAS-Dh44-R2<sup>RNAi TRiP</sup></i></b>                           | <b>47</b> | <b>74.5</b> | <b>23.42 ± 0.13</b>     |
| <i>+&gt;UAS-Dh44-R2<sup>RNAi NIG</sup></i>                                                  | 48        | 100         | 23.91 ± 0.04            |
| <b><i>elav&gt;UAS-Dicer2, UAS-Dh44-R2<sup>RNAi NIG</sup></i></b>                            | <b>47</b> | <b>93.6</b> | <b>23.93 ± 0.14</b>     |
| <i>+&gt;UAS-Dh44-R1<sup>RNAi kk</sup>, UAS-Dh44-R2<sup>RNAi NIG</sup></i>                   | 40        | 97.5        | 23.82 ± 0.05            |
| <b><i>elav&gt;Dicer2, Dh44-R1<sup>RNAi kk</sup>, Dh44-R2<sup>RNAi NIG</sup></i></b>         | <b>39</b> | <b>84.6</b> | <b>23.63 ± 0.09</b>     |
|                                                                                             |           |             |                         |
| <i>Dh44-R1<sup>R21A07</sup>&gt;UAS-Dicer2</i>                                               | 31        | 100         | 23.87 ± 0.06            |
| <i>+&gt;UAS-Dh44-R1<sup>RNAi kk</sup></i>                                                   | 32        | 100         | 23.40 ± 0.04            |
| <b><i>Dh44-R1<sup>R21A07</sup>&gt;UAS-Dicer2, UAS-Dh44-R1<sup>RNAi kk</sup></i></b>         | <b>31</b> | <b>96.8</b> | <b>23.25 ± 0.07</b>     |
|                                                                                             |           |             |                         |
| <i>Dh44-R1<sup>R21A07</sup>&gt;UAS-Dicer2</i>                                               | 31        | 100         | 23.87 ± 0.04            |
| <i>+&gt;UAS-Dh44-R1<sup>RNAi TRiP</sup></i>                                                 | 31        | 100         | 23.37 ± 0.06            |
| <b><i>Dh44-R1<sup>R21A07</sup>&gt;UAS-Dicer2, UAS-Dh44-R1<sup>RNAi TRiP</sup></i></b>       | <b>31</b> | <b>96.9</b> | <b>23.81 ± 0.06</b>     |
|                                                                                             |           |             |                         |
| <i>+&gt;UAS-TrpA1/+ (21°C)</i>                                                              | 31        | 100         | 23.64 ± 0.09            |
| <i>+&gt;UAS-TrpA1/+ (28°C)</i>                                                              | 31        | 100         | 23.68 ± 0.15            |
| <i>Dh44-R1<sup>R21A07</sup>-GAL4&gt;+ (21°C)</i>                                            | 32        | 96.9        | 23.91 ± 0.33            |
| <i>Dh44-R1<sup>R21A07</sup>-GAL4&gt;+ (28°C)</i>                                            | 32        | 100         | 23.70 ± 0.23            |
| <b><i>Dh44-R1<sup>R21A07</sup>&gt;UAS-TrpA1 (21°C)</i></b>                                  | <b>31</b> | <b>93.5</b> | <b>23.70 ± 0.18</b>     |
| <b><i>Dh44-R1<sup>R21A07</sup>&gt;UAS-TrpA1 (28°C)</i></b>                                  | <b>31</b> | <b>31</b>   | <b>23.39 ± 0.08</b>     |
|                                                                                             |           |             |                         |
| <i>Dh44-R1<sup>DsRed/+</sup>; hugin&gt;UAS-Dicer2</i>                                       | 30        | 100         | 23.53 ± 0.04            |
| <i>Dh44-R1<sup>DsRed/+</sup>; +&gt;UAS-Dh44-R1<sup>RNAi kk</sup></i>                        | 32        | 100         | 23.24 ± 0.33            |
| <b><i>Dh44-R1<sup>DsRed/+</sup>; hug&gt;UAS-Dicer2, UAS-Dh44-R1<sup>RNAi kk</sup></i></b>   | <b>29</b> | <b>96.6</b> | <b>23.80 ± 0.45</b>     |
| <i>Dh44-R1<sup>DsRed/+</sup>; +&gt;UAS-Dh44-R1<sup>RNAi TRiP/+</sup></i>                    | 24        | 95.8        | 23.78 ± 0.05            |
| <b><i>Dh44-R1<sup>DsRed/+</sup>; hug&gt;UAS-Dicer2, UAS-Dh44-R1<sup>RNAi TRiP</sup></i></b> | <b>19</b> | <b>78.9</b> | <b>23.67 ± 0.19</b>     |



|                                                                                |           |             |                     |
|--------------------------------------------------------------------------------|-----------|-------------|---------------------|
| +>UAS- <i>t-Dh44</i>                                                           | 62        | 100         | 23.56 ± 0.05        |
| <i>hugin</i> -GAL4>+                                                           | 61        | 100         | 23.58 ± 0.03        |
| <b><i>hugin</i>&gt;UAS-<i>t-Dh44</i></b>                                       | <b>60</b> | <b>96.8</b> | <b>23.50 ± 0.07</b> |
|                                                                                |           |             |                     |
| <i>hugin</i> -GAL4>+                                                           | 32        | 100         | 23.64 ± 0.04        |
| +>UAS- <i>Kir2.1</i>                                                           | 32        | 100         | 23.47 ± 0.05        |
| <b><i>hugin</i>&gt;UAS-<i>Kir2.1</i></b>                                       | <b>31</b> | <b>96.8</b> | <b>23.39 ± 0.07</b> |
| +>UAS- <i>reaper</i>                                                           | 32        | 100         | 23.83 ± 0.03        |
| <b><i>hugin</i>&gt;UAS-<i>reaper</i></b>                                       | <b>31</b> | <b>90.3</b> | <b>23.81 ± 0.06</b> |
|                                                                                |           |             |                     |
| <i>hugin</i> >UAS- <i>Dicer2</i>                                               | 47        | 100         | 24.02 ± 0.04        |
| +>UAS- <i>hugin</i> <sup>RNAI TRIP</sup>                                       | 47        | 100         | 23.45 ± 0.04        |
| <b><i>hugin</i>&gt;UAS-<i>Dicer2</i>, UAS-<i>hugin</i><sup>RNAI TRIP</sup></b> | <b>48</b> | <b>91.7</b> | <b>23.53 ± 0.05</b> |
| +>UAS- <i>hugin</i> <sup>RNAI GD</sup>                                         | 48        | 100         | 23.89 ± 0.03        |
| <b><i>hugin</i>&gt;UAS-<i>Dicer2</i>, UAS-<i>hugin</i><sup>RNAI GD</sup></b>   | <b>47</b> | <b>100</b>  | <b>23.89 ± 0.02</b> |

**Table S2. Detailed fly genotypes used in experiments. Related to Figures 1-6 and S1-5.**

| <b>Figure</b> | <b>Genotype</b>                                                                                                                                                                                                                                                                                                                                                                          |
|---------------|------------------------------------------------------------------------------------------------------------------------------------------------------------------------------------------------------------------------------------------------------------------------------------------------------------------------------------------------------------------------------------------|
| Figure 1B     | w/Y; <i>Dh44-R1<sup>DsRed</sup>/+</i><br>w/Y; <i>Dh44-R1<sup>DsRed</sup>/Dh44-R1<sup>DsRed</sup></i><br>w/Y; <i>Df(2R)BSC700/+</i><br>w/Y; <i>Dh44-R1<sup>DsRed</sup>/Df(2R)BSC700</i>                                                                                                                                                                                                   |
| Figure 1C     | w/Y; <i>Dh44-R2<sup>174</sup>/+</i><br>w/Y; <i>Dh44-R2<sup>174</sup>/Dh44-R2<sup>174</sup></i><br>w/Y; <i>Df(2R)BSC305/+</i><br>w/Y; <i>Dh44-R2<sup>174</sup>/Df(2R)BSC305</i>                                                                                                                                                                                                           |
| Figure 1D     | w/Y; <i>Dh44-R2<sup>174</sup>,Dh44-R1<sup>DsRed</sup>/+</i><br>w/Y; <i>Dh44-R2<sup>174</sup>,Dh44-R1<sup>DsRed</sup>/ Dh44-R2<sup>174</sup>,Dh44-R1<sup>DsRed</sup></i>                                                                                                                                                                                                                  |
| Figure 1E     | w/Y; <i>Dh44-R1<sup>DsRed</sup></i><br>w, <i>per<sup>01</sup>/Y</i><br>w;; <i>pdf<sup>0</sup></i><br>w, <i>pdf<sup>han5304</sup>/Y</i><br>w/Y <i>iso31</i>                                                                                                                                                                                                                               |
| Figure 1F     | w, <i>elav-GAL4/Y; UAS-Dicer2/+; +/+</i><br>w/Y; <i>UAS-Dh44-R1 RNAi kk/+; +/+</i><br>w, <i>elav-GAL4/Y; UAS-Dicer2/UAS-Dh44-R1 RNAi kk; +/+</i><br>w/Y; <i>+/+; UAS-Dh44-R1 RNAi TRiP/+</i><br>w, <i>elav-GAL4/Y; UAS-Dicer2/+; UAS-Dh44-R1 RNAi TRiP/+</i>                                                                                                                             |
| Figure 1G     | w, <i>elav-GAL4/Y; UAS-Dicer2/+; +/+</i><br>w/Y; <i>+/+; UAS-Dh44-R2 RNAi NIG/+</i><br>w, <i>elav-GAL4/Y; UAS-Dicer2/+; UAS-Dh44-R2 RNAi NIG/+</i><br>w/Y; <i>+/+; UAS-Dh44-R2 RNAi TRiP/+</i><br>w, <i>elav-GAL4/Y; UAS-Dicer2/+; UAS-Dh44-R2 RNAi TRiP/+</i>                                                                                                                           |
| Figure 1H     | <i>elav-GAL4/Y; UAS-Dicer2/+; +/+</i><br>w/Y; <i>UAS-Dh44-R1 RNAi kk/+; UAS-Dh44-R2 RNAi NIG/+</i><br><i>elav-GAL4/Y; UAS-Dicer2/UAS-Dh44-R1 RNAi kk; UAS-Dh44-R2 RNAi NIG/+</i>                                                                                                                                                                                                         |
| Figure 1I     | w/Y; <i>UAS-GFP.nls/+; Dh44-R1<sup>R21A07</sup>-GAL4/+</i>                                                                                                                                                                                                                                                                                                                               |
| Figure 1J-K.  | w/Y; <i>+/+; Dh44-R1<sup>R21A07</sup>-GAL4/+</i><br>w/Y; <i>UAS-dTrpA1/+; +/+</i><br>w/Y; <i>UAS-dTrpA1/+; Dh44-R1<sup>R21A07</sup>-GAL4/+</i>                                                                                                                                                                                                                                           |
| Figure 2A     | w/Y; <i>UAS-Dh44-R1 RNAi kk/+; UAS-Dicer2/+</i><br>w/Y; <i>+/+; GAL4/+ or w/Y; GAL4/+; +/+</i><br>w/Y; <i>UAS-Dh44-R1 RNAi kk/+; UAS-Dicer2/GAL4 or w/Y; UAS-Dh44-R1 RNAi kk/GAL4; UAS-Dicer2/+</i>                                                                                                                                                                                      |
| Figure 2B     | w/Y; <i>UAS-GFP.nls/+; GAL4/+</i>                                                                                                                                                                                                                                                                                                                                                        |
| Figure 2C     | w/Y; <i>Dh44-R1<sup>DsRed</sup>/+; hug-GAL4/UAS-Dicer2</i><br>w/Y; <i>Dh44-R1<sup>DsRed</sup>/+,UAS-Dh44-R1 RNAi kk; UAS-Dicer2/+</i><br>w/Y; <i>Dh44-R1<sup>DsRed</sup>/+,UAS-Dh44-R1 RNAi kk; hug-GAL4/UAS-Dicer2</i><br>w/Y; <i>Dh44-R1<sup>DsRed</sup>/+,UAS-Dicer2; UAS-Dh44-R1 RNAi TRiP/+</i><br>w/Y; <i>Dh44-R1<sup>DsRed</sup>/+,UAS-Dicer2; hug-GAL4/UAS-Dh44-R1 RNAi TRiP</i> |
| Figure 2D     | w/Y; <i>UAS-t-Dh44/+</i><br>w/Y; <i>+/+; hug-GAL4/+</i><br>w/Y; <i>UAS-t-Dh44/+; hug-GAL4/+</i>                                                                                                                                                                                                                                                                                          |
| Figure 3B     | w/Y; <i>UAS-Denmark,UAS-syt-GFP/+; hug-GAL4/+</i>                                                                                                                                                                                                                                                                                                                                        |
| Figure 3C     | w/Y; <i>UAS-Denmark,UAS-syt-GFP/+; Dh44-GAL4/+</i>                                                                                                                                                                                                                                                                                                                                       |

|                       |                                                                                                                                                                                                                                                                                                                                                   |
|-----------------------|---------------------------------------------------------------------------------------------------------------------------------------------------------------------------------------------------------------------------------------------------------------------------------------------------------------------------------------------------|
| Figure 3D, 3G         | <i>w/Y; hug-LexA/LexAop-CD4-spGFP11; Dh44-GAL4/UAS-Nrx-spGFP1-10</i>                                                                                                                                                                                                                                                                              |
| Figure 3E.            | <i>w/Y; Dh44-LexA/UAS-Denmark; hug-GAL4/LexAop-Rab3-GFP</i>                                                                                                                                                                                                                                                                                       |
| Figure 3F, H          | <i>w/Y; hug-LexA/UAS-Denmark; Dh44-GAL4/LexAop-Rab3-GFP</i>                                                                                                                                                                                                                                                                                       |
| Figure 3I-J           | <i>w/Y; hug-LexA/UAS-P2X2; Dh44-GAL4/LexAop-GCaMP6m-p10</i><br><i>w/Y; hug-LexA/UAS-P2X2; Dh44-GAL4/LexAop-GCaMP6m-p10</i><br><i>w/Y; hug-LexA/UAS-P2X2; +/-LexAop-GCaMP6m-p10</i>                                                                                                                                                                |
| Figure 3K-M           | <i>w/Y; Dh44-R1<sup>DsRed</sup>,UAS-P2X2/Dh44-R1<sup>DsRed</sup>,hug-LexA; Dh44-GAL4/LexAop-GCaMP6m-p10</i><br><i>w/Y; Dh44-R1<sup>DsRed</sup>,UAS-P2X2/+,hug-LexA; Dh44-GAL4/LexAop-GCaMP6m-p10</i><br><i>w/Y; Dh44-R1<sup>DsRed</sup>,UAS-P2X2/+,hug-LexA; +/-LexAop-GCaMP6m-p10</i>                                                            |
| Figure 4A             | <i>w/Y; +/+; hug-GAL4/+</i><br><i>w/Y; +/+; UAS-Kir2.1/+</i><br><i>w/Y; +/+; hug-GAL4/UAS-Kir2.1</i><br><i>yw,UAS-reaper/Y; +/+; +/+</i><br><i>yw,UAS-reaper/Y; +/+; hug-GAL4/+</i>                                                                                                                                                               |
| Figure 4B             | <i>w/Y; UAS-Dicer2/+; hug-GAL4/+</i><br><i>w/Y; +/+; UAS-hugin RNAi TRiP/+</i><br><i>w/Y; UAS-Dicer2/+; hug-GAL4/UAS-hugin RNAi TRiP</i><br><i>w/Y; +/+; UAS-hugin RNAi GD/+</i><br><i>w/Y; UAS-Dicer2/+; hug-GAL4/UAS-hugin RNAi GD</i>                                                                                                          |
| Figure 4C             | <i>w/Y; UAS-Denmark,UAS-syt-GFP/+; hug-GAL4/+</i>                                                                                                                                                                                                                                                                                                 |
| Figure 4D             | <i>w/Y; hug-LexA,vglut-GAL4/UAS-Denmark; LexAop-Rab3-GFP/+</i>                                                                                                                                                                                                                                                                                    |
| Figure 4E             | <i>w/Y; hug-LexA,vglut-GAL4/LexAop-CD4-spGFP11; UAS-CD4-spGFP1-10/+</i>                                                                                                                                                                                                                                                                           |
| Figure 5              | <i>w/Y; UAS-ANF-GFP,UAS-myr-RFP/+; hug-GAL4/+</i><br><i>w, per<sup>01</sup>/Y; UAS-ANF-GFP,UAS-myr-RFP/+; hug-GAL4/+</i>                                                                                                                                                                                                                          |
| Figure 6A-B.          | <i>w/Y; Df(2R)BSC700/+</i><br><i>w/Y;Dh44-R1<sup>DsRed</sup>/+</i><br><i>w/Y;Dh44-R1<sup>DsRed</sup>/Df(2R)BSC700</i>                                                                                                                                                                                                                             |
| Figure 6C, 6D,<br>6F. | <i>w/Y; +/+; hug-GAL4/+</i><br><i>w/Y; +/+; UAS-Kir2.1/+</i><br><i>w/Y; +/+; hug-GAL4/UAS-Kir2.1</i>                                                                                                                                                                                                                                              |
| Figure 6E             | <i>w/Y;Dh44-R1<sup>DsRed</sup>/+</i><br><i>w/Y;Dh44-R1<sup>DsRed</sup>/Dh44-R1<sup>DsRed</sup></i>                                                                                                                                                                                                                                                |
| Figure S1A            | <i>w/Y; Dh44-R2<sup>174</sup>/+</i><br><i>w/Y; Dh44-R2<sup>174</sup>/Dh44-R2<sup>174</sup></i><br><i>w/Y; Dh44-R1<sup>DsRed</sup>/+</i><br><i>w/Y; Dh44-R1<sup>DsRed</sup>/Dh44-R1<sup>DsRed</sup></i>                                                                                                                                            |
| Figure S1C            | <i>w/Y; Dh44-R1<sup>DsRed</sup>/+</i><br><i>w/Y; Dh44-R1<sup>DsRed</sup>/Dh44-R1<sup>DsRed</sup></i>                                                                                                                                                                                                                                              |
| Figure S1D            | <i>w/Y; Dh44-R2<sup>174</sup>/+</i><br><i>w/Y; Dh44-R2<sup>174</sup>/Dh44-R2<sup>174</sup></i>                                                                                                                                                                                                                                                    |
| Figure S1E            | <i>w/Y; Dh44-R2<sup>174</sup>,Dh44-R1<sup>DsRed</sup>/+</i><br><i>w/Y; Dh44-R2<sup>174</sup>,Dh44-R1<sup>DsRed</sup>/Dh44-R2<sup>174</sup>,Dh44-R1<sup>DsRed</sup></i>                                                                                                                                                                            |
| Figure S1F            | <i>w/Y iso31</i>                                                                                                                                                                                                                                                                                                                                  |
| Figure S2A-B          | <i>w/Y; UAS-Dicer2/+; tubulin-GAL4/+</i><br><i>w/Y; UAS-Dicer2/+; tubulin-GAL4/UAS-Dh44-R2 RNAi NIG</i><br><i>w/Y; UAS-Dicer2/+; tubulin-GAL4/ UAS-Dh44-R2 RNAi TRiP</i><br><i>w/Y; UAS-Dicer2/+; tubulin-GAL4/ UAS-Dh44-R1 RNAi TRiP</i><br><i>w,elav-GAL4/Y; UAS-Dicer2/+; +/+</i><br><i>w,elav-GAL4/Y; UAS-Dicer2/UAS-Dh44-R1 RNAi kk; +/+</i> |

|              |                                                                                                                                                                                                                                                                                                                                                          |
|--------------|----------------------------------------------------------------------------------------------------------------------------------------------------------------------------------------------------------------------------------------------------------------------------------------------------------------------------------------------------------|
| Figure S2C-D | <p>w/Y; +/+; <i>Dh44-R1<sup>R21A07</sup>-GAL4/UAS-Dicer2</i></p> <p>w/Y; <i>UAS-Dh44-R1 RNAi kk/+; UAS-Dicer2/+</i></p> <p>w/Y; <i>UAS-Dh44-R1 RNAi kk/+; Dh44-R1<sup>R21A07</sup>-GAL4/UAS-Dicer2</i></p> <p>w/Y; <i>UAS-Dicer2/+; UAS-Dh44-R1 RNAi TRiP/+</i></p> <p>w/Y; <i>UAS-Dicer2/+; Dh44-R1<sup>R21A07</sup>-GAL4/UAS-Dh44-R1 RNAi TRiP</i></p> |
| Figure S3    | <p>w/Y; <i>UAS-Dh44-R1 RNAi kk/+; UAS-Dicer2/+</i></p> <p>w/Y; +/+; <i>GAL4/+</i> or w/Y; <i>GAL4/+; +/+</i></p> <p>w/Y; <i>UAS-Dh44-R1 RNAi kk/+; UAS-Dicer2/GAL4</i> or w/Y; <i>UAS-Dh44-R1 RNAi kk/GAL4; UAS-Dicer2/+</i></p>                                                                                                                         |
| Figure S4A   | <p>w,<i>elav-GAL4/Y; UAS-Dicer2/+; +/+</i></p> <p>w,<i>elav-GAL4/Y; UAS-Dicer2/+; UAS-hugin RNAi TRiP/+</i></p> <p>w,<i>elav-GAL4/Y; UAS-Dicer2/+; UAS-hugin RNAi GD/+</i></p>                                                                                                                                                                           |
| Figure S4B   | w/Y <i>iso31</i>                                                                                                                                                                                                                                                                                                                                         |
| Figure S5A-B | <p>w/Y <i>iso31</i></p> <p>w/Y; <i>Dh44-R2<sup>174</sup>/+; +/+</i></p> <p>w/Y; <i>Dh44-R2<sup>174</sup>/Dh44-R2<sup>174</sup>; +/+</i></p>                                                                                                                                                                                                              |
| Figure S5C-D | <p>w/Y; +/+; <i>hug-GAL4/+</i></p> <p>w/Y; +/+; <i>UAS-Kir2.1/+</i></p> <p>w/Y; +/+; <i>hug-GAL4/UAS-Kir2.1</i></p> <p>w/Y; <i>Dh44-R1<sup>DsRed</sup>/+ and w/Y; Dh44-R1<sup>DsRed</sup>/Dh44-R1<sup>DsRed</sup></i></p>                                                                                                                                |

**Table S3. Sequences used in generating *Dh44-R1* and *Dh44-R2* CRISPR mutants. Related to STAR Methods.**

| <b>Primer</b>                                                                                              | <b>Sequence 5' → 3'</b>            |
|------------------------------------------------------------------------------------------------------------|------------------------------------|
| gRNA sequences and primers used to generate and screen <i>Dh44-R1</i> and <i>Dh44-R2</i> CRISPR mutations. |                                    |
| gRNA to exon 6 of <i>Dh44-R2</i>                                                                           | GATAACCACAGAGTCTAGTC AGG           |
| gRNA to 5' end of <i>Dh44-R1</i>                                                                           | GTTGTCAATTCGTAGGGAAA TGG           |
| gRNA to 3' end of <i>Dh44-R1</i>                                                                           | GGGCATTGTTGGAGCCCCGG TGG           |
| Cloning primers for HDR template <i>Dh44-R1</i> <sup>DsRed</sup>                                           |                                    |
| 5'HA-Dh44-R1 Forward                                                                                       | CATTGCATGCGTGGAGCACCCAAGCCTTG      |
| 5'HA-Dh44-R1 Reverse                                                                                       | TACTGCGGCCCGCCCTACGAATTGACAACG TTC |
| 3'HA-Dh44-R1 Forward                                                                                       | TATAACTAGTGGGCTCCAACAATGCCCTG      |
| 3'HA-Dh44-R1 Reverse                                                                                       | AGTGGCGCGCCAAAGAGCCTTTATTACGAAGGAC |
| Primers for PCR verification of <i>Dh44-R2</i> CRISPR mutation                                             |                                    |
| Dh44-R2 Po Forward                                                                                         | TCAACGAAGTTTACCTTGCCAATC           |
| Dh44-R2 Pi Forward                                                                                         | GATAACCACAGAGTCTAGTCAGG            |
| Dh44-R2 P Reverse                                                                                          | ATGAGGGCGTAGATAATAAAGC             |
| Primers for PCR verification of <i>Dh44-R1</i> CRISPR mutation                                             |                                    |
| 5'HA Dh44-R1 far Forward                                                                                   | ACGAAGCCGAGCATAACAGTG              |
| 5'HA HDR Reverse                                                                                           | CGGTTCGAGGGTTTCGAAATCGATAAG        |
| 3'HA HDR Forward                                                                                           | GTGGTTTGTCCAAACTCATC               |
| 3'HA Dh44-R1 far Reverse                                                                                   | GAGCGTCGGACCCAATTAGC               |

## Supplemental References

- S1. Marchler-Bauer, A., Derbyshire, M.K., Gonzales, N.R., Lu, S., Chitsaz, F., Geer, L.Y., Geer, R.C., He, J., Gwadz, M., Hurwitz, D.I., *et al.* (2015). CDD: NCBI's conserved domain database. *Nucleic Acids Res.* 43, D222-6.
- S2. Hughes, M.E., Hogenesch, J.B., and Kornacker, K. (2010). JTK\_CYCLE: An Efficient Nonparametric Algorithm for Detecting Rhythmic Components in Genome-Scale Data Sets. *J. Biol. Rhythms* 25, 372–380.
